# Supplementary figures and images for: Sector coupling leading to low-carbon production of power and chemicals in China
Source: Royal Society of Chemistry journal article supplement (doi:10.1039/d2se01749k), 2023-01-01

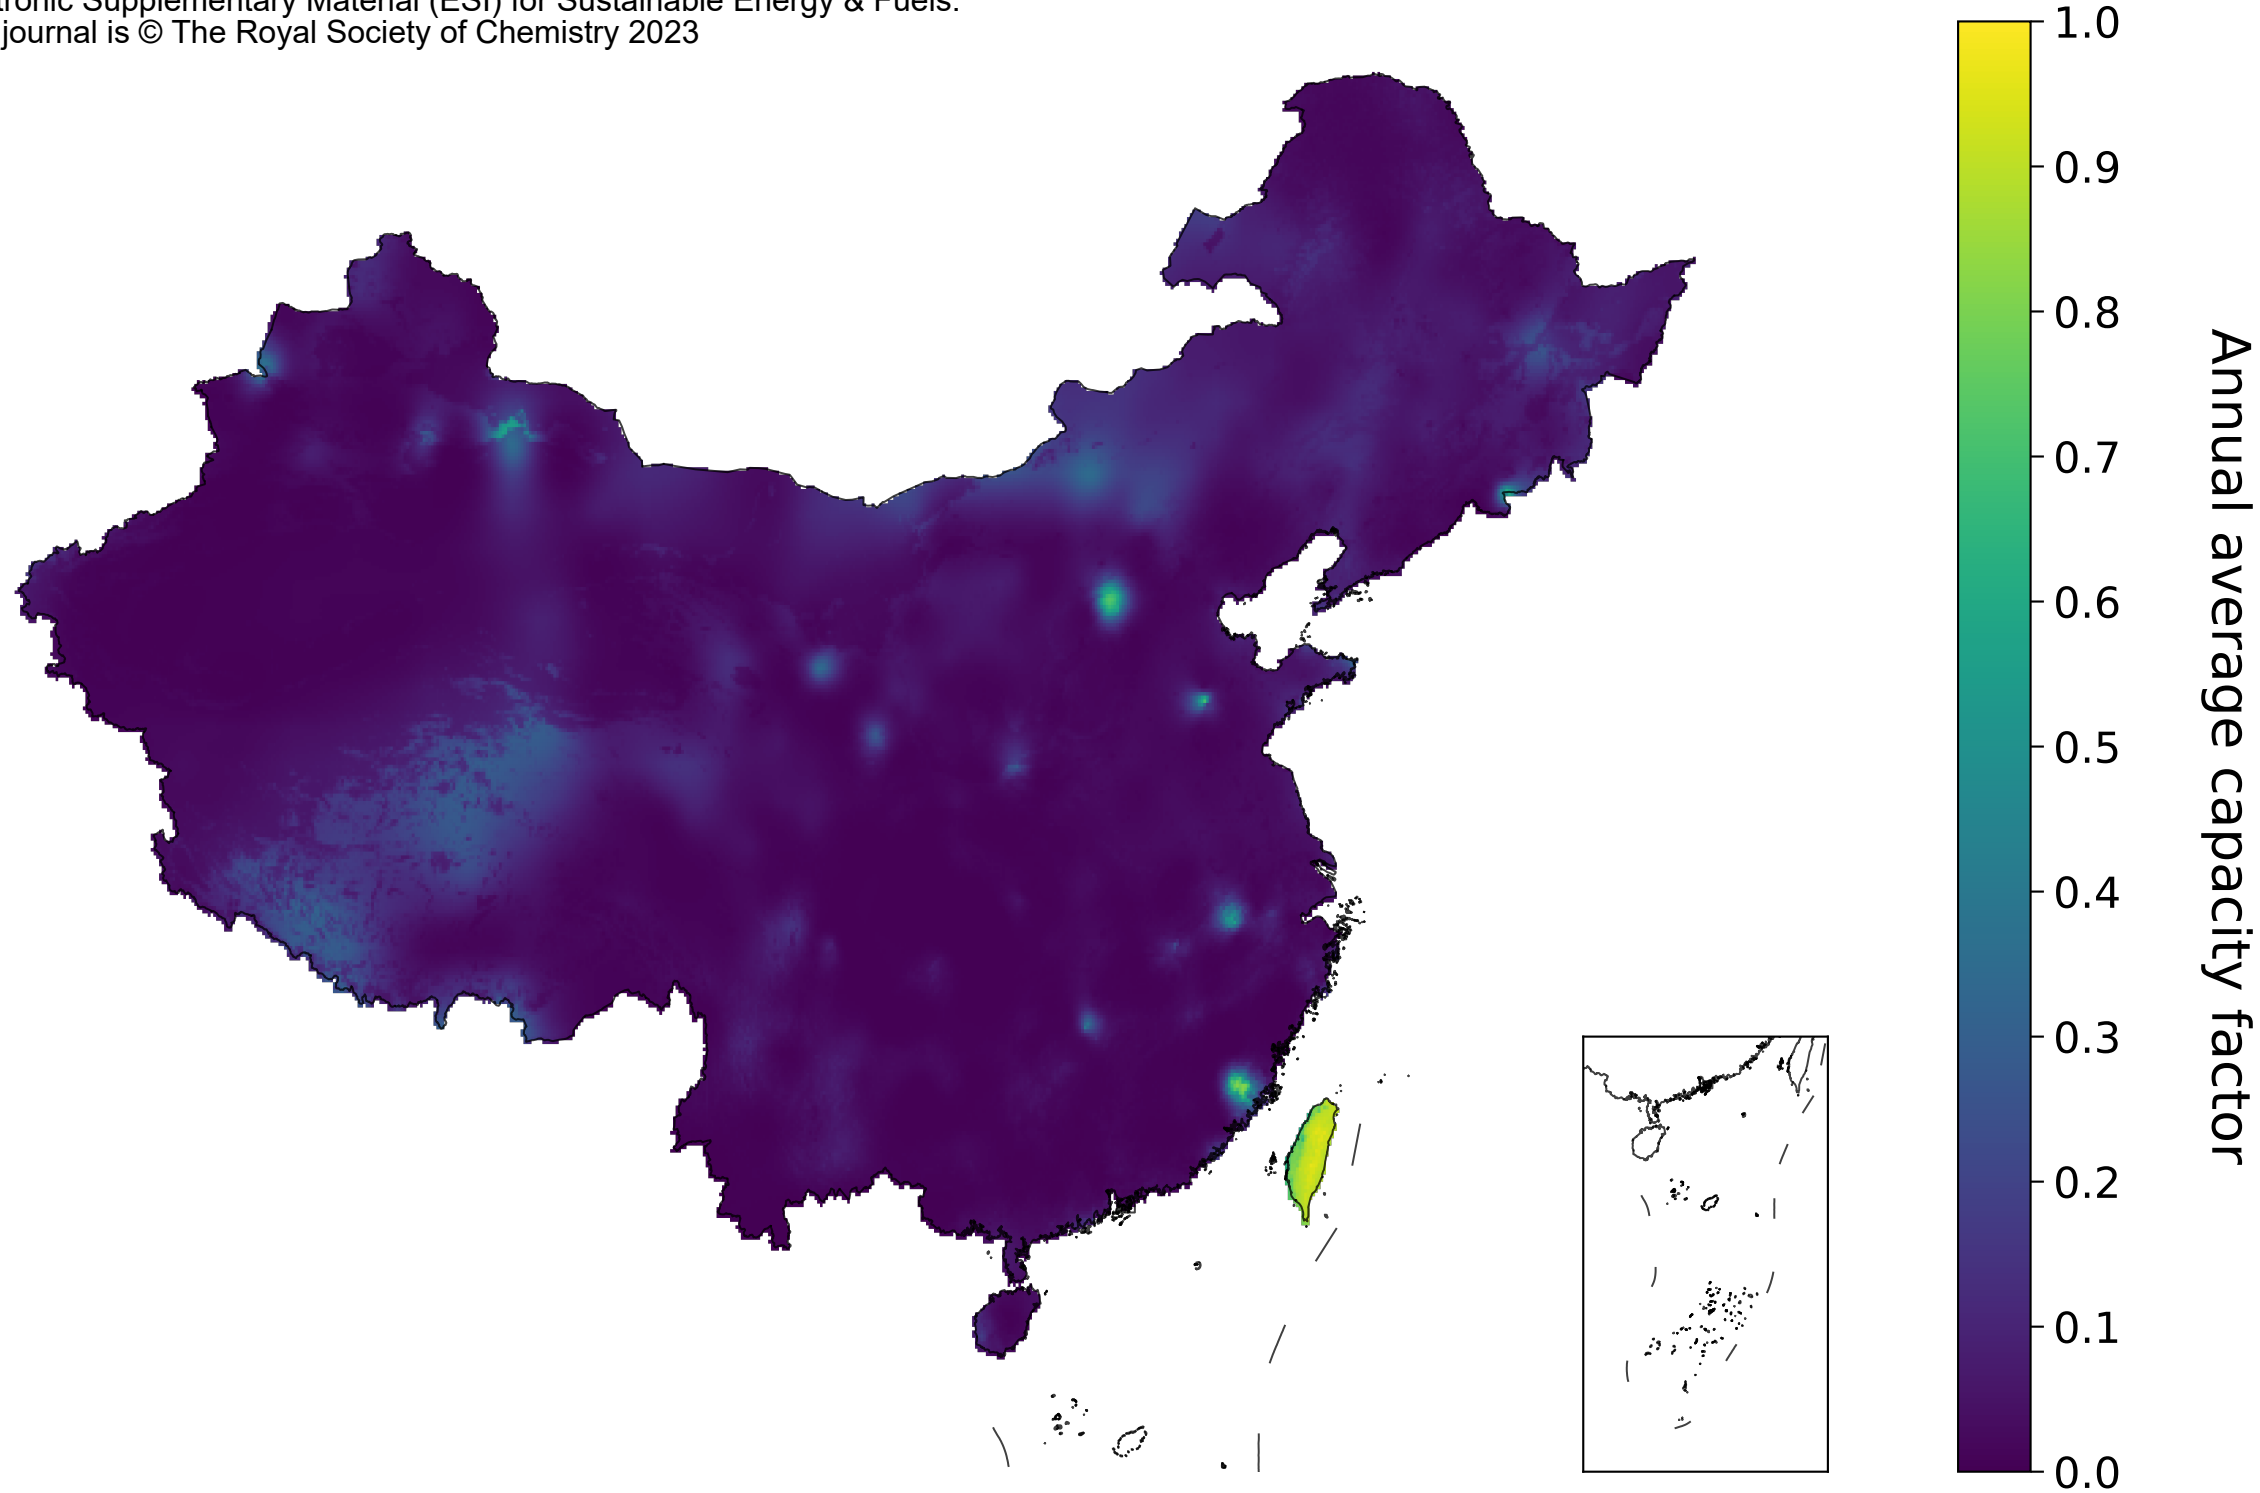

Supplement: d2se01749k1.pdf [file d2se01749k1.pdf]

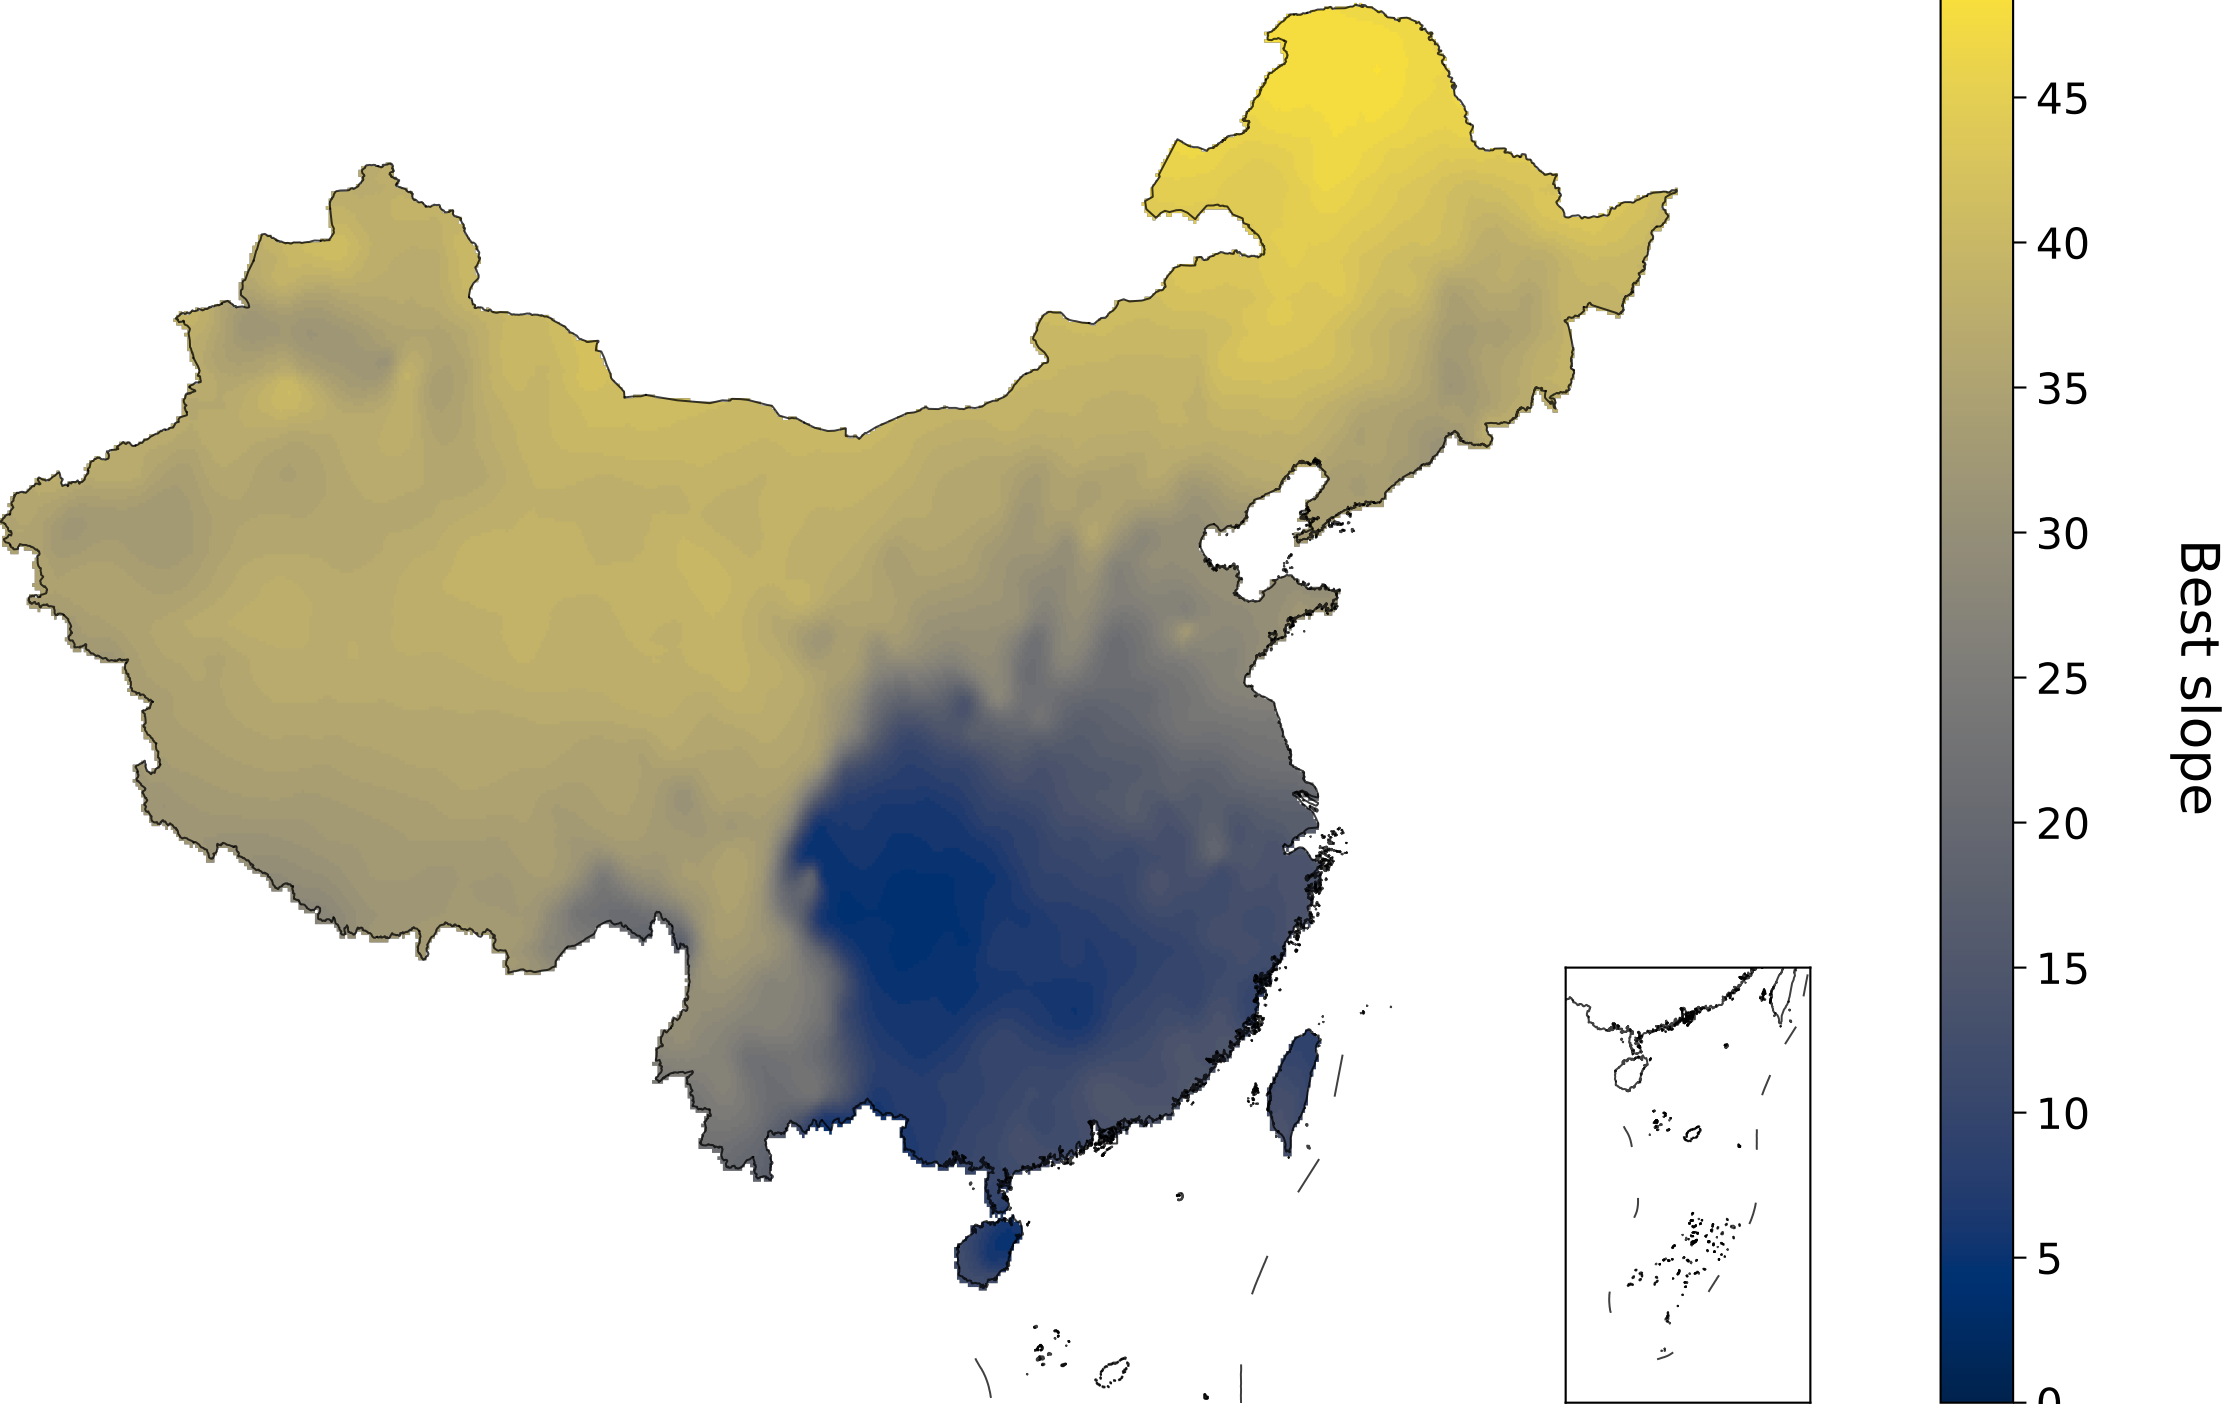

Supplement: d2se01749k3.pdf [file d2se01749k3.pdf]

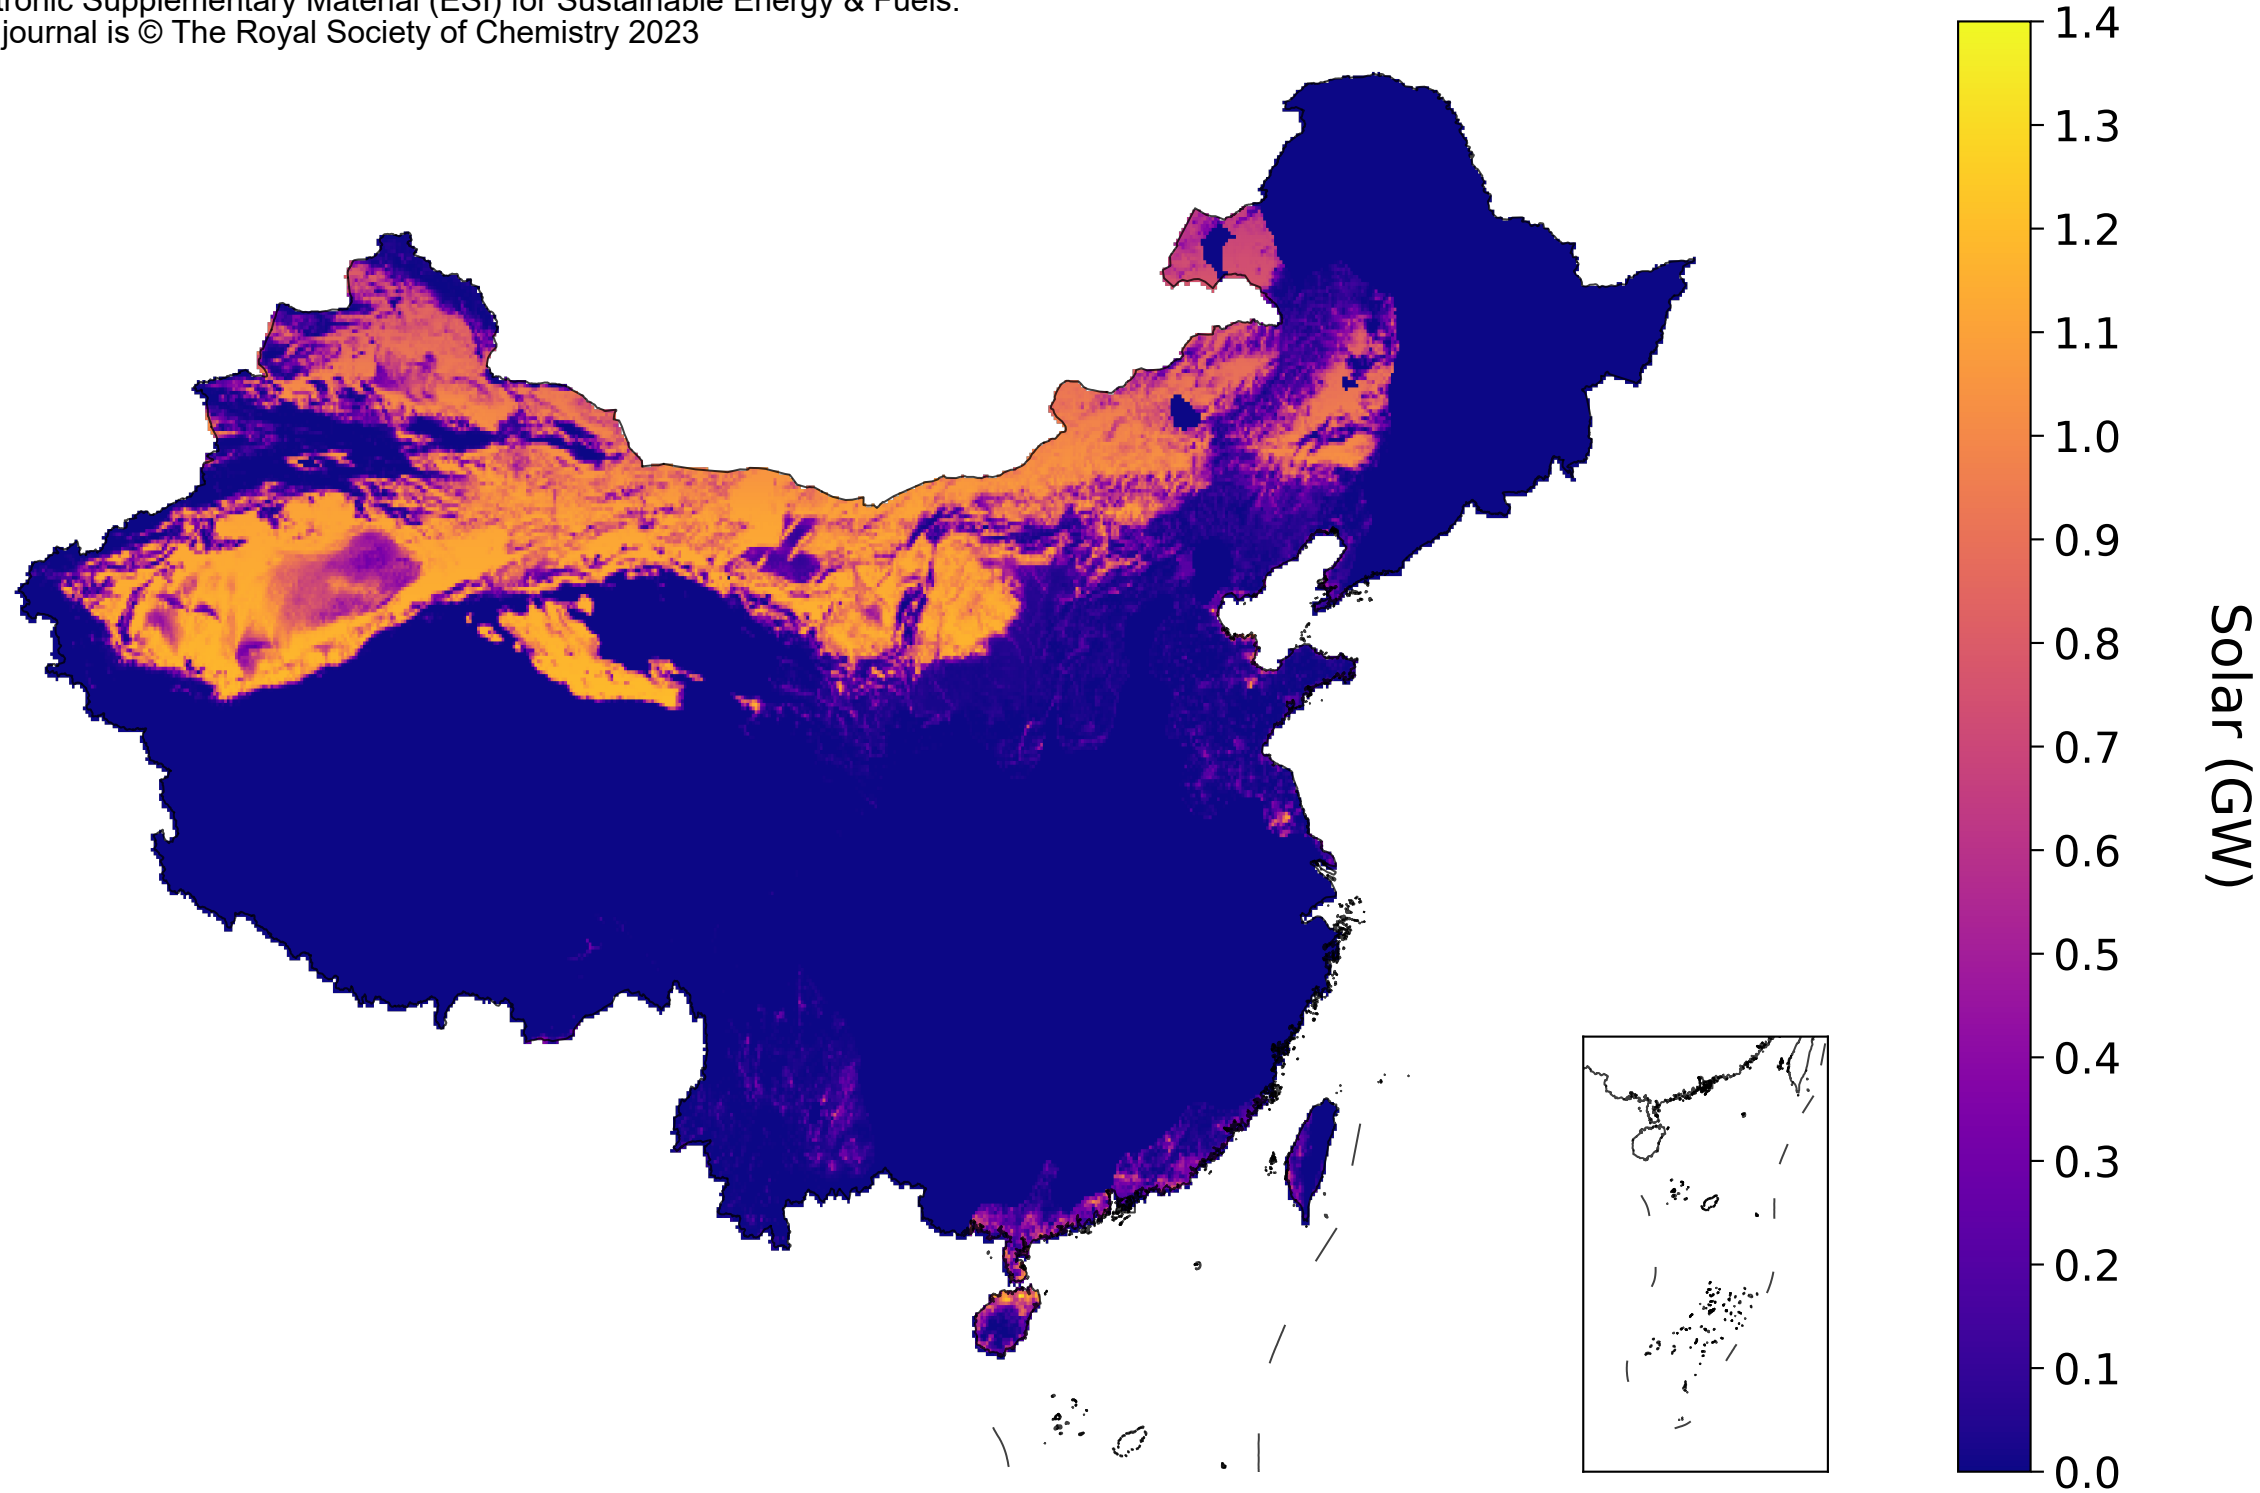

Supplement: d2se01749k6.pdf [file d2se01749k6.pdf]
